# Supplementary material for: 27-Hydroxycholesterol, The Estrogen Receptor Modulator, Alters DNA Methylation in Breast Cancer
Source: Front Endocrinol (Lausanne). 2022 Mar 10;13:783823. doi: 10.3389/fendo.2022.783823 (PMC8961300; doi:10.3389/fendo.2022.783823)
Supplement: Supplementary Table 1 — List of differentially methylated genes upon 27 HC treatment for 72 h in MCF-7 cells. [file Table_1.xls]

## Sheet: Read_me
			MedGenome Labs Pvt. Ltd., 3rd Floor, Narayana Netralaya Building,
			Narayana Health City, # 258/A, Bommasandra, Hosur Road,
			Bangalore – 560 099, India www.medgenome.com
Supplementary Table 1	Differentially methylated promoter level
Client Name	Dr. Arumugam
Institute	RGCB
sheet 2	list of differentially methylated genes in comparison1
sheet 3	list of hypermethylated genes compared to control
sheet 4	list of top 100 hypermethlated genes
sheet 5	list of hypomethlated genes
sheet 6	list of top hypomethlated genes
Headers	Description
Gene_name	Gene_name
Control1	respective beta value for control
Control2	respective beta value for control
27_HC1	respective beta value for treated
27_HC2	respective beta value for treated
std.p	standard deviation for population
std.s	standard deviation for sample set

## Sheet: list_of_promoters_comp1
Gene_name	Control1	Control2	27_HC1	27_HC2	std.p	std.s
RNU6-335P	0.66209	0.790783	0.892433	0.944478	0.107827	0.124508
RNU4ATAC9P	0.278879	0.425926	0.539312	0.526119	0.104177	0.120293
RNU6-1326P	0.561418	0.755496	0.832082	0.787132	0.103307	0.119289
MIR576	0.907677	0.657774	0.833956	0.880789	0.0973329	0.11239
RN7SL336P	0.617212	0.706	0.858768	0.809557	0.0934458	0.107902
RNU6-1318P	0.664312	0.908182	0.791546	0.738383	0.0888854	0.102636
RNU6-866P	0.702519	0.689033	0.832941	0.888129	0.0847929	0.0979104
RBMY1A3P	0.26608	0.359104	0.484279	0.44933	0.0847335	0.0978418
LINC00687	0.334178	0.141464	0.302033	0.349712	0.0828537	0.0956712
RNU6-1086P	0.495136	0.624253	0.67714	0.713419	0.0827299	0.0955282
THRA	0.753397	0.887382	0.944296	0.955697	0.0803725	0.0928062
RNU6-519P	0.644577	0.690838	0.791853	0.846485	0.0798482	0.0922007
RNU6-1120P	0.553993	0.529089	0.713909	0.651692	0.074498	0.0860228
LINC01049	0.288054	0.092287	0.14142	0.142322	0.0733067	0.0846473
RN7SL692P	0.627481	0.674996	0.790329	0.792719	0.0721314	0.0832902
HMGB3P4	0.761268	0.789082	0.920805	0.912876	0.0715669	0.0826383
EYS	0.774998	0.966439	0.916417	0.892213	0.0702611	0.0811305
FAM197Y2	0.444805	0.25	0.328895	0.363174	0.0699356	0.0807546
TSPY10	0.444805	0.25	0.328895	0.363174	0.0699356	0.0807546
TSPY11P	0.297724	0.193904	0.368249	0.356133	0.0689319	0.0795957
OR2A12	0.571825	0.585675	0.724612	0.706754	0.0689315	0.0795952
RNU6-39P	0.166188	0.0295854	0.0856991	0.201027	0.0671724	0.077564
RNU6-68P	0.544079	0.725353	0.641592	0.591973	0.0670499	0.0774226
CYLC1	0.128358	0.161309	0.239667	0.295028	0.0653548	0.0754652
RNU1-78P	0.610325	0.761341	0.659523	0.597621	0.0644161	0.0743813
RPL6P12	0.788047	0.880876	0.957045	0.929395	0.0642637	0.0742053
MIRLET7A2	0.117774	0.12708	0.25557	0.238028	0.0625812	0.0722625
DYTN	0.338806	0.398448	0.449364	0.505014	0.061467	0.070976
SNORD116-27	0.107504	0.0883775	0.148693	0.245606	0.0606659	0.0700509
RNU2-22P	0.643633	0.644386	0.781375	0.741413	0.0603693	0.0697084
MIR556	0.811941	0.975118	0.934704	0.909086	0.0600959	0.0693927
RN7SL26P	0.676927	0.836321	0.767371	0.724123	0.0586444	0.0677167
LINC00376	0.80331	0.946183	0.811273	0.874167	0.0574673	0.0663575
LINC00558	0.869343	0.808153	0.953574	0.934386	0.0572931	0.0661564
RNY5P4	0.356024	0.49389	0.373284	0.366297	0.056061	0.0647337
RNU6-1042P	0.729837	0.757924	0.869769	0.830432	0.0557917	0.0644228
SERPINH1P1	0.821489	0.930456	0.957653	0.945898	0.0542038	0.0625891
RN7SL56P	0.841518	0.948665	0.972029	0.966711	0.0530839	0.061296
PPP1R14BP2	0.788223	0.925684	0.826927	0.808774	0.0527768	0.0609414
RNU6-664P	0.788223	0.925684	0.826927	0.808774	0.0527768	0.0609414
RNU6-1059P	0.759306	0.806624	0.869726	0.892456	0.052456	0.060571
OR4K11P	0.0189518	0.0980145	0.120223	0.163309	0.0524159	0.0605247
SUMO2P15	0.833276	0.896391	0.820399	0.753058	0.0508911	0.058764
SUMO2P8	0.824384	0.839567	0.945219	0.916782	0.0508074	0.0586673
LINC01075	0.188612	0.0567687	0.0826644	0.0940698	0.0498357	0.0575453
UBE2NL	0.853481	0.919787	0.803333	0.794642	0.0497944	0.0574976
CTDSPL2	0.235648	0.165228	0.120198	0.234138	0.048765	0.056309
RNA5SP220	0.805698	0.92517	0.816134	0.818499	0.0486182	0.0561395
PTDSS2	0.834817	0.848594	0.928886	0.944814	0.0481515	0.0556006
SUMO1P2	0.744083	0.876861	0.829456	0.822857	0.0476518	0.0550236
RNU7-123P	0.710733	0.694007	0.796334	0.796155	0.0473086	0.0546273
MIR548P	0.829446	0.83173	0.926189	0.921063	0.0465616	0.0537647
MIR613	0.806197	0.918944	0.894647	0.918077	0.0462282	0.0533797
KCNJ16	0.0794754	0.00751259	0.0891307	0.135865	0.0459425	0.0530498
RNU6-1188P	0.921485	0.981733	0.913718	0.855185	0.0448277	0.0517626
MIR1277	0.743763	0.846456	0.854322	0.799519	0.0441206	0.050946
RNU6-266P	0.765472	0.677032	0.758066	0.7955	0.043861	0.0506463
IDO1	0.591264	0.628744	0.703036	0.679141	0.0434815	0.0502081
USP26	0.942221	0.857661	0.967074	0.958076	0.0434127	0.0501286
RNU6-786P	0.858754	0.979982	0.911932	0.929431	0.0433098	0.0500098
NPM1P27	0.829382	0.860431	0.753955	0.77598	0.0421743	0.0486987
RNU12-2P	0.861516	0.841727	0.92899	0.938644	0.0418286	0.0482995
OR2A14	0.183048	0.143654	0.242433	0.241678	0.0417451	0.048203
TXNP3	0.133155	0.134965	0.202618	0.226311	0.0410705	0.0474242
SUCNR1	0.927237	0.850165	0.951923	0.947103	0.040865	0.0471869
RN7SKP159	0.0484006	0.159722	0.0852743	0.080218	0.0408147	0.0471288
SYTL5	0.840914	0.917478	0.804619	0.852581	0.0407468	0.0470504
RNU6-116P	0.13951	0.0704113	0.122601	0.183545	0.0404946	0.0467591
RNY4P22	0.844666	0.944909	0.877875	0.849096	0.0400571	0.046254
RNA5SP347	0.0787142	0.0837194	0.157752	0.163828	0.0398837	0.0460537
TRGJP	0.912246	0.836774	0.931187	0.934284	0.0395065	0.0456182
MIR3201	0.862381	0.966219	0.94617	0.925669	0.0389513	0.044977
HMGN1P33	0.831532	0.933633	0.848676	0.875429	0.038703	0.0446904
MIR1263	0.860644	0.854278	0.932769	0.936136	0.0385796	0.0445479
MIR1256	0.825146	0.891894	0.840284	0.785201	0.038211	0.0441222
HSPA8P18	0.959411	0.914337	0.873688	0.869074	0.0364548	0.0420944
FDPSP2	0.0844985	0.0849145	0.147231	0.164975	0.0362455	0.0418527
MIER3	0.763567	0.798001	0.86224	0.822924	0.0360025	0.0415721
GCNT3	0.132154	0.116586	0.19063	0.198571	0.0356546	0.0411704
RNU6-435P	0.840529	0.837762	0.921837	0.892371	0.035554	0.0410542
RNU6-268P	0.77115	0.783243	0.829847	0.856866	0.0346962	0.0400637
RNU6-592P	0.849965	0.802243	0.889805	0.880768	0.0342131	0.0395059
FCF1P5	0.936817	0.926805	0.867122	0.861178	0.0340799	0.0393521
EIF1AX-AS1	0.790509	0.794008	0.860553	0.859972	0.0340251	0.0392888
RNU6-897P	0.968565	0.888521	0.964029	0.964371	0.0334477	0.0386221
SDHCP2	0.839587	0.932126	0.872235	0.883543	0.0332008	0.038337
MTND4P20	0.156343	0.109306	0.202105	0.161951	0.0329144	0.0380063
RPL23AP51	0.823791	0.786716	0.861109	0.868453	0.032626	0.0376733
LINC00459	0.230739	0.157482	0.23115	0.23584	0.0325788	0.0376187
OR6C4	0.144293	0.126084	0.212199	0.153248	0.0322607	0.0372514
RNU6-13P	0.788281	0.731481	0.813369	0.806094	0.0321119	0.0370797
RNU6-697P	0.910559	0.959599	0.90834	0.870605	0.0316007	0.0364894
RPL31P58	0.879924	0.882888	0.938287	0.949351	0.0314684	0.0363366
MIR3064	0.889999	0.974511	0.955945	0.942332	0.0314199	0.0362806
RPEP4	0.873325	0.908993	0.955095	0.938868	0.0311606	0.0359812
MIR98	0.947243	0.972543	0.957844	0.891464	0.0306796	0.0354257
RPL19P21	0.908633	0.986004	0.916045	0.941661	0.0302579	0.0349388
RNU6ATAC32P	0.897572	0.87348	0.953106	0.927504	0.0300778	0.0347308
C4A	0.886135	0.830184	0.904423	0.901489	0.029901	0.0345267
LINC00310	0.848935	0.926779	0.870566	0.861588	0.029768	0.0343732
ARL2BPP10	0.756207	0.82129	0.753413	0.751083	0.0293806	0.0339258
DLEU7-AS1	0.917408	0.95082	0.895803	0.871736	0.0290788	0.0335774
TMSB4Y	0.108599	0.0864151	0.158366	0.147457	0.0290484	0.0335422
ESR1	0.902256	0.977886	0.950521	0.927173	0.0279911	0.0323213
RN7SKP273	0.902433	0.974828	0.950324	0.963986	0.0276452	0.0319219
TMEM123	0.910037	0.947658	0.892933	0.872683	0.0275334	0.0317928
RN7SL412P	0.900143	0.878342	0.942293	0.941272	0.0273797	0.0316153
RNU4-36P	0.902159	0.975721	0.956448	0.953942	0.0272629	0.0314805
IGKV2D-26	0.100862	0.071963	0.13276	0.139998	0.0271128	0.0313072
MIR4797	0.881241	0.950695	0.890209	0.917676	0.027082	0.0312716
CRISP3	0.946843	0.881422	0.938442	0.945282	0.0270753	0.0312638
NACAP1	0.933622	0.862896	0.903371	0.922418	0.0269105	0.0310735
RNU6-1301P	0.50638	0.580694	0.545756	0.534926	0.0265997	0.0307147
RPL21P23	0.877602	0.950114	0.92979	0.920824	0.0264585	0.0305517
RNU2-30P	0.951642	0.954179	0.894399	0.908509	0.0262228	0.0302795
MIR5591	0.890326	0.937791	0.865105	0.901755	0.0261543	0.0302003
RNU6-129P	0.928008	0.986155	0.919681	0.935656	0.0259	0.0299067
RNU6-539P	0.949471	0.940521	0.892803	0.894833	0.0257939	0.0297842
RPS7P3	0.96177	0.917335	0.986812	0.970846	0.0257744	0.0297617
RNU6-731P	0.856866	0.883173	0.918918	0.916538	0.0256175	0.0295805
MIR4282	0.0541211	0.0592291	0.0966097	0.114079	0.025171	0.029065
IGLV2-14	0.850662	0.893084	0.843884	0.824282	0.0251	0.0289829
MIR4484	0.912449	0.978812	0.965405	0.960402	0.0250644	0.0289419
UQCRC2P1	0.916494	0.977558	0.95516	0.92266	0.024791	0.0286261
RNU6-114P	0.168208	0.215269	0.233874	0.219916	0.0247021	0.0285235
C7orf72	0.100382	0.0491717	0.109346	0.106302	0.0245357	0.0283314
OR10C1	0.14389	0.0752709	0.116836	0.112384	0.0244411	0.0282222
RN7SL277P	0.954385	0.902002	0.945478	0.966872	0.0244123	0.0281889
RN7SL820P	0.96378	0.89675	0.92886	0.934123	0.0237793	0.027458
NUMB	0.88206	0.921947	0.855775	0.879192	0.0237766	0.0274549
RNU6ATAC29P	0.897341	0.961497	0.943385	0.93725	0.0234288	0.0270533
RNU6ATAC34P	0.913436	0.946068	0.977033	0.960535	0.0234094	0.0270309
RNA5SP168	0.900114	0.949967	0.88792	0.915928	0.0232876	0.0268901
SCGB2B3P	0.888092	0.919599	0.859116	0.867909	0.0232477	0.0268441
RN7SKP144	0.0690952	0.0408015	0.102284	0.0888374	0.0231302	0.0267085
RNA5SP38	0.927629	0.931863	0.927413	0.982131	0.0230885	0.0266603
CBX3P9	0.935921	0.98009	0.926956	0.923927	0.022586	0.02608
MRPL53P1	0.920598	0.945809	0.978501	0.968591	0.0223296	0.025784
RN7SL299P	0.907692	0.96786	0.950931	0.938593	0.0219944	0.0253969
RN7SL605P	0.894412	0.881524	0.920555	0.936951	0.0216844	0.025039
RPS6P8	0.889896	0.950156	0.922477	0.914269	0.0215179	0.0248467
YWHAEP7	0.832625	0.886941	0.839977	0.865265	0.0214834	0.0248069
TMEM209	0.852688	0.907394	0.901548	0.889998	0.0212751	0.0245664
TAS2R4	0.88741	0.834515	0.866932	0.843231	0.0207027	0.0239055
RNU6-72P	0.908461	0.902182	0.952204	0.938075	0.0206458	0.0238398
RNU7-3P	0.885839	0.931914	0.9126	0.938547	0.0204749	0.0236424
SYP-AS1	0.927644	0.952002	0.89756	0.910789	0.0203408	0.0234876
RNU6-680P	0.971023	0.983798	0.963667	0.929416	0.0201314	0.0232457
RN7SL16P	0.925317	0.977982	0.968708	0.962062	0.0199847	0.0230764
TTLL3	0.914084	0.884549	0.927675	0.937427	0.0199263	0.0230089
RNA5SP51	0.885793	0.93858	0.927295	0.92424	0.0198893	0.0229662
RNU5A-5P	0.91691	0.920042	0.955675	0.959853	0.0197305	0.0227828
RNU1-73P	0.920873	0.873616	0.916894	0.919344	0.0197188	0.0227693
RNU6-413P	0.941874	0.946401	0.899779	0.912343	0.019615	0.0226494
RNU6-840P	0.836717	0.835838	0.820659	0.788463	0.019523	0.0225433
DEFB122	0.0639146	0.0155413	0.0517939	0.0609872	0.0192995	0.0222852
RNU2-39P	0.911461	0.947765	0.896542	0.908812	0.0191039	0.0220592
RN7SKP163	0.938226	0.963642	0.987422	0.980746	0.0190012	0.0219407
RN7SL80P	0.918885	0.971	0.938999	0.938887	0.018668	0.021556
CFL1P4	0.957517	0.950873	0.921394	0.914806	0.0183481	0.0211865
MIR1305	0.928807	0.89205	0.92166	0.941271	0.0180995	0.0208995
ZNF800	0.775123	0.820882	0.778359	0.791098	0.0180574	0.0208508
MTND1P9	0.880959	0.931037	0.90335	0.897729	0.0180243	0.0208127
RNU6-768P	0.934404	0.977452	0.963662	0.93776	0.0179531	0.0207304
RNU6-379P	0.933555	0.979422	0.94246	0.940029	0.017939	0.0207142
ZNF583	0.0770573	0.0706614	0.0992291	0.115709	0.0179294	0.020703
RNA5SP86	0.894393	0.907594	0.939004	0.930166	0.0177098	0.0204496
RN7SL718P	0.117213	0.157536	0.159148	0.156104	0.0175193	0.0202296
MIR4666A	0.934862	0.90272	0.945078	0.94479	0.0173208	0.0200003
RN7SL621P	0.927132	0.972801	0.954485	0.938499	0.017195	0.0198551
RNA5SP189	0.928732	0.97722	0.954969	0.954649	0.0171678	0.0198236
RNU6-43P	0.942875	0.981748	0.938879	0.947176	0.0170431	0.0196797
RN7SKP120	0.0593988	0.0264787	0.0728577	0.0512434	0.0168872	0.0194997
MIR3942	0.935607	0.963871	0.92106	0.924146	0.0168861	0.0194984
RMDN2	0.839039	0.79365	0.815638	0.827531	0.0167946	0.0193927
IL9RP4	0.914645	0.961895	0.942376	0.940279	0.0167917	0.0193894
RN7SL683P	0.918842	0.965538	0.940967	0.947692	0.0167139	0.0192995
KRT8P31	0.930319	0.934211	0.966001	0.964312	0.016514	0.0190687
ROPN1	0.934292	0.980154	0.954431	0.950389	0.0164546	0.0190001
RN7SL226P	0.0490474	0.0206763	0.0434982	0.0660397	0.0162235	0.0187333
MUC7	0.0832201	0.0453044	0.0772762	0.0837954	0.0158499	0.0183019
MIR660	0.884891	0.92336	0.888727	0.887624	0.0157712	0.018211
MIR5006	0.921534	0.953547	0.929988	0.910784	0.0157409	0.018176
RNA5SP465	0.946264	0.967198	0.981419	0.986926	0.0157107	0.0181411
MPP7	0.0750473	0.047694	0.0726213	0.0916268	0.0156956	0.0181237
RNU6-957P	0.973886	0.963857	0.942879	0.935186	0.0155744	0.0179838
SOSTDC1	0.0838944	0.0529271	0.0809436	0.095253	0.0155681	0.0179765
CLDN20	0.94451	0.977315	0.979537	0.950806	0.0155639	0.0179716
RNU6-836P	0.931982	0.956428	0.968225	0.971613	0.0155384	0.0179422
RN7SKP287	0.948208	0.935411	0.967558	0.972514	0.0149242	0.017233
RNU6-912P	0.972905	0.961632	0.943734	0.934863	0.0148761	0.0171774
GAPDHP16	0.94507	0.946484	0.976183	0.97427	0.0147489	0.0170306
MIR2681	0.0453743	0.0738194	0.0353838	0.0437248	0.0145005	0.0167437
SLMAP	0.937985	0.965771	0.926081	0.943485	0.0144022	0.0166302
ATG16L1	0.917388	0.900122	0.929282	0.938206	0.0142594	0.0164654
MIR1255A	0.987323	0.972407	0.965841	0.948182	0.0140486	0.0162219
CRIPAK	0.950462	0.979738	0.947547	0.945161	0.0139894	0.0161536
COX7A2	0.933943	0.957372	0.919592	0.929031	0.0139163	0.0160692
HNRNPA1P55	0.0696678	0.0413176	0.0787298	0.0664932	0.0138725	0.0160186
MIR3198-1	0.91605	0.907858	0.940753	0.937124	0.0138593	0.0160034
RPL32P33	0.922815	0.933552	0.955457	0.953758	0.0137597	0.0158883
IGKV1-12	0.054033	0.0227833	0.0384267	0.0567133	0.0135961	0.0156994
ANTXR2	0.915136	0.937816	0.912887	0.90015	0.0135702	0.0156695
RNU6ATAC30P	0.958825	0.968435	0.934588	0.940931	0.0135607	0.0156585
RPL31P60	0.929558	0.922337	0.95528	0.949024	0.0135308	0.015624
RNA5SP87	0.0363744	0.0264936	0.061903	0.0507736	0.0135182	0.0156095
OR8B2	0.943562	0.971462	0.939449	0.940301	0.0132346	0.015282
RNU6-1074P	0.936486	0.96053	0.925819	0.931444	0.0132281	0.0152745
RNA5SP188	0.92979	0.966452	0.944834	0.942684	0.0131662	0.0152031
RNU6-970P	0.949641	0.963116	0.928157	0.937832	0.0130808	0.0151044
HSD17B12	0.403662	0.39844	0.369762	0.385908	0.0130668	0.0150882
MIR670HG	0.403662	0.39844	0.369762	0.385908	0.0130668	0.0150882
RUNX1	0.930968	0.929983	0.962003	0.936208	0.0130409	0.0150584
RNA5SP53	0.953286	0.989374	0.965667	0.972014	0.0130144	0.0150277
DEC1	0.0613401	0.050171	0.0697927	0.035524	0.0128369	0.0148227
TUBB4BP7	0.0601297	0.0470988	0.0818225	0.0687202	0.0126468	0.0146033
ZNF630-AS1	0.950517	0.976112	0.946478	0.945256	0.0125771	0.0145228
RAD1P1	0.933564	0.945036	0.963891	0.961935	0.0125029	0.0144372
RPL21P111	0.923698	0.958045	0.935638	0.935495	0.0124301	0.0143531
CICP13	0.935546	0.928191	0.960248	0.934245	0.0122638	0.014161
RNY3P4	0.923436	0.907105	0.940246	0.93185	0.0122506	0.0141458
FAF2P1	0.966016	0.978829	0.946337	0.955366	0.0121259	0.0140018
BTF3P9	0.942981	0.971243	0.941363	0.947491	0.0120319	0.0138932
HMGB1P48	0.947266	0.97913	0.953598	0.95854	0.0119448	0.0137927
NIFKP6	0.952281	0.964661	0.940049	0.93372	0.0118602	0.013695
NR3C1	0.922057	0.945603	0.92929	0.951345	0.0118584	0.013693
TRAV9-1	0.042872	0.0100125	0.0255258	0.0314709	0.0118509	0.0136842
RNU6-223P	0.941009	0.96913	0.941592	0.943416	0.0117785	0.0136007
RN7SL160P	0.936476	0.951341	0.928582	0.919878	0.0115714	0.0133615
RNU6-807P	0.948137	0.975857	0.948644	0.951753	0.0114918	0.0132696
RNU6-571P	0.955243	0.960594	0.930438	0.946032	0.0114387	0.0132082
RNU6-58P	0.923133	0.952365	0.949188	0.944726	0.0114235	0.0131907
RN7SL682P	0.972948	0.990992	0.959237	0.970181	0.0114085	0.0131734
RN7SL198P	0.953968	0.963754	0.93787	0.937023	0.0112563	0.0129976
KRTAP2-4	0.977725	0.995258	0.970802	0.965643	0.0111891	0.0129201
RNU1-77P	0.951915	0.975083	0.95306	0.945452	0.0111825	0.0129124
RNA5SP182	0.961609	0.990505	0.969688	0.96727	0.0109298	0.0126206
MTCP1	0.927759	0.949575	0.920808	0.926782	0.0109201	0.0126094
MIRLET7F2	0.935344	0.965846	0.950553	0.948021	0.0108409	0.012518
AAED1	0.0425592	0.069546	0.0645961	0.0503597	0.010811	0.0124835
MIR3938	0.923817	0.948067	0.926977	0.920419	0.0107874	0.0124562
CKS1BP7	0.952268	0.930794	0.958169	0.954425	0.0106728	0.0123238
LINC00458	0.883277	0.89232	0.863636	0.874091	0.0106545	0.0123027
XRCC6P4	0.0505672	0.0285782	0.0532643	0.0543114	0.0105401	0.0121707
CHML	0.964528	0.957876	0.98278	0.980555	0.0105292	0.0121581
RNU4ATAC14P	0.975988	0.980088	0.961003	0.954458	0.0105145	0.0121411
LECT2	0.917887	0.941545	0.943061	0.926969	0.0104571	0.0120748
RNU4-35P	0.954464	0.926032	0.947097	0.94241	0.010434	0.0120481
FAM229A	0.941731	0.924847	0.950446	0.949354	0.0102356	0.0118191
RNU6-917P	0.047792	0.0325376	0.0492857	0.0611511	0.0101655	0.0117382
OR10A6	0.0580478	0.0449762	0.0444894	0.0295994	0.0100698	0.0116276
NPM1P24	0.938091	0.958632	0.940454	0.931732	0.00999397	0.01154
ADORA2A	0.95205	0.951483	0.972494	0.97078	0.00995534	0.0114954
RNU6-480P	0.0436953	0.0350735	0.0511497	0.0621564	0.00994922	0.0114884
RNU7-158P	0.950684	0.976502	0.962518	0.954773	0.00984555	0.0113687
RNU7-185P	0.0347414	0.0195186	0.0459218	0.0390667	0.00968795	0.0111867
SNORD103A	0.950235	0.977151	0.967686	0.966264	0.00966972	0.0111656
UBN2	0.948584	0.964159	0.944968	0.937778	0.009645	0.0111371
SDHCP3	0.962267	0.976412	0.956905	0.950415	0.00957819	0.0110599
NAP1L1P1	0.97601	0.95137	0.970087	0.97227	0.00951326	0.010985
TATDN1P1	0.966138	0.946672	0.971951	0.964947	0.0094742	0.0109399
PPP4R1	0.0514958	0.0426722	0.0261673	0.0450462	0.00933892	0.0107837
RNU6-361P	0.967927	0.992069	0.981069	0.97185	0.0093064	0.0107461
RFWD2P1	0.0411834	0.029251	0.0449473	0.0545066	0.00904728	0.0104469
RNU6-655P	0.0489684	0.0319181	0.0286297	0.0472849	0.00902143	0.0104171
TM4SF20	0.939269	0.959175	0.936554	0.940211	0.00897628	0.0103649
RN7SKP247	0.969409	0.987393	0.963907	0.968528	0.00895578	0.0103412
INTS8	0.0374809	0.0182163	0.0283732	0.0410914	0.00885751	0.0102278
OR10J3	0.0443168	0.0388938	0.0484974	0.0626474	0.00880192	0.0101636
MIR4723	0.96477	0.971959	0.951338	0.953281	0.00844837	0.00975534
FRRS1	0.0356178	0.0151709	0.0345624	0.0332704	0.00840385	0.00970393
RNU4-44P	0.959978	0.940032	0.96094	0.955704	0.00839329	0.00969174
RPS17	0.0364179	0.0287958	0.0420979	0.0515386	0.00830022	0.00958426
RNU2-19P	0.0119197	0.00830076	0.0199983	0.0297209	0.00823645	0.00951064
RNU6-248P	0.0298053	0.0196421	0.0425604	0.0332213	0.00819494	0.00946271
RN7SL281P	0.980401	0.992367	0.978601	0.969357	0.00818837	0.00945512
HNRNPH1	0.0223398	0.00902322	0.0297001	0.027253	0.00799019	0.00922628
RNU6-759P	0.929058	0.928899	0.939553	0.947501	0.00779841	0.00900483
RNU1-19P	0.971051	0.989258	0.973145	0.970526	0.00771981	0.00891407
ZSWIM6	0.0436193	0.0300773	0.0458153	0.0507994	0.00767176	0.00885858
ERCC1	0.0162441	0.00904557	0.0262649	0.0277207	0.00762946	0.00880974
RN7SL573P	0.974754	0.980696	0.962225	0.96405	0.00761785	0.00879634
RSL24D1P9	0.0212704	0.0050958	0.0254077	0.0182008	0.00760102	0.0087769
RN7SKP90	0.938563	0.947858	0.927363	0.93341	0.00751545	0.0086781
NA	0.979112	0.961648	0.976733	0.980081	0.00745871	0.00861258
RNU6-219P	0.962121	0.9819	0.973758	0.968293	0.00727189	0.00839686
FAM21B	0.963006	0.982775	0.970236	0.969655	0.00714578	0.00825124
TMSB4XP4	0.0189121	0.00720954	0.0172712	0.0272556	0.00712401	0.00822609
MIR548F2	0.952432	0.955147	0.936949	0.94823	0.00694179	0.00801569
SCARNA6	0.95148	0.953772	0.949217	0.967016	0.00691317	0.00798264
RNU7-165P	0.974273	0.959313	0.977467	0.972096	0.00689469	0.0079613
RNU6-503P	0.0405758	0.0486877	0.0336269	0.0318696	0.00662687	0.00765206
MIR566	0.942525	0.943967	0.952868	0.958519	0.00655645	0.00757074
LINC01058	0.0385943	0.0351654	0.051978	0.0450928	0.00643104	0.00742592
LRRC53	0.0251804	0.0179403	0.0314404	0.0347302	0.00641179	0.0074037
BLMH	0.0210692	0.0230756	0.0118943	0.028666	0.00603885	0.00697306
ECD	0.023747	0.0127333	0.0213882	0.0295142	0.00603461	0.00696816
MRPS36	0.0292693	0.0209223	0.0290773	0.0377363	0.00594555	0.00686533
ZACN	0.0201776	0.0200743	0.0300693	0.0334516	0.005939	0.00685777
FDX1P1	0.972989	0.984616	0.98832	0.984924	0.00579884	0.00669593
ATP6V0CP1	0.974953	0.977756	0.968026	0.963138	0.00574302	0.00663147
RNU6-800P	0.0118389	0.013091	0.0227041	0.024875	0.0057312	0.00661782
UBA52P8	0.956379	0.957081	0.968365	0.967969	0.00572569	0.00661146
RNU6-1194P	0.0238909	0.0184094	0.0308938	0.0316539	0.00542684	0.00626637
RN7SKP297	0.985469	0.988893	0.98083	0.974472	0.00540587	0.00624216
RIMKLBP1	0.963925	0.94992	0.95666	0.95571	0.00497651	0.00574638
RN7SKP77	0.0274679	0.0290519	0.0389785	0.0360373	0.00477245	0.00551075
SEC31A	0.0329373	0.0320378	0.0310017	0.042654	0.00466721	0.00538923
IFI6	0.0163435	0.0214882	0.0250188	0.0285026	0.00449566	0.00519114
TBXAS1	0.0207931	0.0163901	0.0277666	0.0260919	0.00448923	0.00518371
IGKV6D-21	0.00935447	0.0114404	0.0178266	0.0193327	0.00419101	0.00483937
UBC	0.0101042	0.0113132	0.0180387	0.0172985	0.00351583	0.00405974
HMGB1P8	0.98672	0.983681	0.989992	0.991615	0.00305479	0.00352736
EIF4EBP2P2	0.0814027	0.08765	0.0896667	0.0864044	0.00304755	0.003519
ARHGAP11A	0.0164415	0.00979002	0.0164055	0.0135587	0.00272289	0.00314412

## Sheet: hyper_methylated
Gene_name	Control1	Control2	27_HC1	27_HC2	std.p	std.s
RNU6-335P	0.66209	0.790783	0.892433	0.944478	0.107827	0.124508
RNU4ATAC9P	0.278879	0.425926	0.539312	0.526119	0.104177	0.120293
RNU6-1326P	0.561418	0.755496	0.832082	0.787132	0.103307	0.119289
MIR576	0.907677	0.657774	0.833956	0.880789	0.0973329	0.11239
RN7SL336P	0.617212	0.706	0.858768	0.809557	0.0934458	0.107902
RNU6-1318P	0.664312	0.908182	0.791546	0.738383	0.0888854	0.102636
RNU6-866P	0.702519	0.689033	0.832941	0.888129	0.0847929	0.0979104
RBMY1A3P	0.26608	0.359104	0.484279	0.44933	0.0847335	0.0978418
LINC00687	0.334178	0.141464	0.302033	0.349712	0.0828537	0.0956712
RNU6-1086P	0.495136	0.624253	0.67714	0.713419	0.0827299	0.0955282
THRA	0.753397	0.887382	0.944296	0.955697	0.0803725	0.0928062
RNU6-519P	0.644577	0.690838	0.791853	0.846485	0.0798482	0.0922007
RNU6-1120P	0.553993	0.529089	0.713909	0.651692	0.074498	0.0860228
LINC01049	0.288054	0.092287	0.14142	0.142322	0.0733067	0.0846473
RN7SL692P	0.627481	0.674996	0.790329	0.792719	0.0721314	0.0832902
HMGB3P4	0.761268	0.789082	0.920805	0.912876	0.0715669	0.0826383
EYS	0.774998	0.966439	0.916417	0.892213	0.0702611	0.0811305
FAM197Y2	0.444805	0.25	0.328895	0.363174	0.0699356	0.0807546
TSPY10	0.444805	0.25	0.328895	0.363174	0.0699356	0.0807546
TSPY11P	0.297724	0.193904	0.368249	0.356133	0.0689319	0.0795957
OR2A12	0.571825	0.585675	0.724612	0.706754	0.0689315	0.0795952
RNU6-39P	0.166188	0.0295854	0.0856991	0.201027	0.0671724	0.077564
RNU6-68P	0.544079	0.725353	0.641592	0.591973	0.0670499	0.0774226
CYLC1	0.128358	0.161309	0.239667	0.295028	0.0653548	0.0754652
RNU1-78P	0.610325	0.761341	0.659523	0.597621	0.0644161	0.0743813
RPL6P12	0.788047	0.880876	0.957045	0.929395	0.0642637	0.0742053
MIRLET7A2	0.117774	0.12708	0.25557	0.238028	0.0625812	0.0722625
DYTN	0.338806	0.398448	0.449364	0.505014	0.061467	0.070976
SNORD116-27	0.107504	0.0883775	0.148693	0.245606	0.0606659	0.0700509
RNU2-22P	0.643633	0.644386	0.781375	0.741413	0.0603693	0.0697084
MIR556	0.811941	0.975118	0.934704	0.909086	0.0600959	0.0693927
RN7SL26P	0.676927	0.836321	0.767371	0.724123	0.0586444	0.0677167
LINC00376	0.80331	0.946183	0.811273	0.874167	0.0574673	0.0663575
LINC00558	0.869343	0.808153	0.953574	0.934386	0.0572931	0.0661564
RNY5P4	0.356024	0.49389	0.373284	0.366297	0.056061	0.0647337
RNU6-1042P	0.729837	0.757924	0.869769	0.830432	0.0557917	0.0644228
SERPINH1P1	0.821489	0.930456	0.957653	0.945898	0.0542038	0.0625891
RN7SL56P	0.841518	0.948665	0.972029	0.966711	0.0530839	0.061296
PPP1R14BP2	0.788223	0.925684	0.826927	0.808774	0.0527768	0.0609414
RNU6-664P	0.788223	0.925684	0.826927	0.808774	0.0527768	0.0609414
RNU6-1059P	0.759306	0.806624	0.869726	0.892456	0.052456	0.060571
OR4K11P	0.0189518	0.0980145	0.120223	0.163309	0.0524159	0.0605247
SUMO2P15	0.833276	0.896391	0.820399	0.753058	0.0508911	0.058764
SUMO2P8	0.824384	0.839567	0.945219	0.916782	0.0508074	0.0586673
LINC01075	0.188612	0.0567687	0.0826644	0.0940698	0.0498357	0.0575453
UBE2NL	0.853481	0.919787	0.803333	0.794642	0.0497944	0.0574976
CTDSPL2	0.235648	0.165228	0.120198	0.234138	0.048765	0.056309
RNA5SP220	0.805698	0.92517	0.816134	0.818499	0.0486182	0.0561395
PTDSS2	0.834817	0.848594	0.928886	0.944814	0.0481515	0.0556006
SUMO1P2	0.744083	0.876861	0.829456	0.822857	0.0476518	0.0550236
RNU7-123P	0.710733	0.694007	0.796334	0.796155	0.0473086	0.0546273
MIR548P	0.829446	0.83173	0.926189	0.921063	0.0465616	0.0537647
MIR613	0.806197	0.918944	0.894647	0.918077	0.0462282	0.0533797
KCNJ16	0.0794754	0.00751259	0.0891307	0.135865	0.0459425	0.0530498
RNU6-1188P	0.921485	0.981733	0.913718	0.855185	0.0448277	0.0517626
MIR1277	0.743763	0.846456	0.854322	0.799519	0.0441206	0.050946
RNU6-266P	0.765472	0.677032	0.758066	0.7955	0.043861	0.0506463
IDO1	0.591264	0.628744	0.703036	0.679141	0.0434815	0.0502081
USP26	0.942221	0.857661	0.967074	0.958076	0.0434127	0.0501286
RNU6-786P	0.858754	0.979982	0.911932	0.929431	0.0433098	0.0500098
NPM1P27	0.829382	0.860431	0.753955	0.77598	0.0421743	0.0486987
RNU12-2P	0.861516	0.841727	0.92899	0.938644	0.0418286	0.0482995
OR2A14	0.183048	0.143654	0.242433	0.241678	0.0417451	0.048203
TXNP3	0.133155	0.134965	0.202618	0.226311	0.0410705	0.0474242
SUCNR1	0.927237	0.850165	0.951923	0.947103	0.040865	0.0471869
RN7SKP159	0.0484006	0.159722	0.0852743	0.080218	0.0408147	0.0471288
SYTL5	0.840914	0.917478	0.804619	0.852581	0.0407468	0.0470504
RNU6-116P	0.13951	0.0704113	0.122601	0.183545	0.0404946	0.0467591
RNY4P22	0.844666	0.944909	0.877875	0.849096	0.0400571	0.046254
RNA5SP347	0.0787142	0.0837194	0.157752	0.163828	0.0398837	0.0460537
TRGJP	0.912246	0.836774	0.931187	0.934284	0.0395065	0.0456182
MIR3201	0.862381	0.966219	0.94617	0.925669	0.0389513	0.044977
HMGN1P33	0.831532	0.933633	0.848676	0.875429	0.038703	0.0446904
MIR1263	0.860644	0.854278	0.932769	0.936136	0.0385796	0.0445479
MIR1256	0.825146	0.891894	0.840284	0.785201	0.038211	0.0441222
HSPA8P18	0.959411	0.914337	0.873688	0.869074	0.0364548	0.0420944
FDPSP2	0.0844985	0.0849145	0.147231	0.164975	0.0362455	0.0418527
MIER3	0.763567	0.798001	0.86224	0.822924	0.0360025	0.0415721
GCNT3	0.132154	0.116586	0.19063	0.198571	0.0356546	0.0411704
RNU6-435P	0.840529	0.837762	0.921837	0.892371	0.035554	0.0410542
RNU6-268P	0.77115	0.783243	0.829847	0.856866	0.0346962	0.0400637
RNU6-592P	0.849965	0.802243	0.889805	0.880768	0.0342131	0.0395059
FCF1P5	0.936817	0.926805	0.867122	0.861178	0.0340799	0.0393521
EIF1AX-AS1	0.790509	0.794008	0.860553	0.859972	0.0340251	0.0392888
RNU6-897P	0.968565	0.888521	0.964029	0.964371	0.0334477	0.0386221
SDHCP2	0.839587	0.932126	0.872235	0.883543	0.0332008	0.038337
MTND4P20	0.156343	0.109306	0.202105	0.161951	0.0329144	0.0380063
RPL23AP51	0.823791	0.786716	0.861109	0.868453	0.032626	0.0376733
LINC00459	0.230739	0.157482	0.23115	0.23584	0.0325788	0.0376187
OR6C4	0.144293	0.126084	0.212199	0.153248	0.0322607	0.0372514
RNU6-13P	0.788281	0.731481	0.813369	0.806094	0.0321119	0.0370797
RNU6-697P	0.910559	0.959599	0.90834	0.870605	0.0316007	0.0364894
RPL31P58	0.879924	0.882888	0.938287	0.949351	0.0314684	0.0363366
MIR3064	0.889999	0.974511	0.955945	0.942332	0.0314199	0.0362806
RPEP4	0.873325	0.908993	0.955095	0.938868	0.0311606	0.0359812
MIR98	0.947243	0.972543	0.957844	0.891464	0.0306796	0.0354257
RPL19P21	0.908633	0.986004	0.916045	0.941661	0.0302579	0.0349388
RNU6ATAC32P	0.897572	0.87348	0.953106	0.927504	0.0300778	0.0347308
C4A	0.886135	0.830184	0.904423	0.901489	0.029901	0.0345267
LINC00310	0.848935	0.926779	0.870566	0.861588	0.029768	0.0343732
ARL2BPP10	0.756207	0.82129	0.753413	0.751083	0.0293806	0.0339258
DLEU7-AS1	0.917408	0.95082	0.895803	0.871736	0.0290788	0.0335774
TMSB4Y	0.108599	0.0864151	0.158366	0.147457	0.0290484	0.0335422
ESR1	0.902256	0.977886	0.950521	0.927173	0.0279911	0.0323213
RN7SKP273	0.902433	0.974828	0.950324	0.963986	0.0276452	0.0319219
TMEM123	0.910037	0.947658	0.892933	0.872683	0.0275334	0.0317928
RN7SL412P	0.900143	0.878342	0.942293	0.941272	0.0273797	0.0316153
RNU4-36P	0.902159	0.975721	0.956448	0.953942	0.0272629	0.0314805
IGKV2D-26	0.100862	0.071963	0.13276	0.139998	0.0271128	0.0313072
MIR4797	0.881241	0.950695	0.890209	0.917676	0.027082	0.0312716
CRISP3	0.946843	0.881422	0.938442	0.945282	0.0270753	0.0312638
NACAP1	0.933622	0.862896	0.903371	0.922418	0.0269105	0.0310735
RNU6-1301P	0.50638	0.580694	0.545756	0.534926	0.0265997	0.0307147
RPL21P23	0.877602	0.950114	0.92979	0.920824	0.0264585	0.0305517
RNU2-30P	0.951642	0.954179	0.894399	0.908509	0.0262228	0.0302795
MIR5591	0.890326	0.937791	0.865105	0.901755	0.0261543	0.0302003
RNU6-129P	0.928008	0.986155	0.919681	0.935656	0.0259	0.0299067
RNU6-539P	0.949471	0.940521	0.892803	0.894833	0.0257939	0.0297842
RPS7P3	0.96177	0.917335	0.986812	0.970846	0.0257744	0.0297617
RNU6-731P	0.856866	0.883173	0.918918	0.916538	0.0256175	0.0295805
MIR4282	0.0541211	0.0592291	0.0966097	0.114079	0.025171	0.029065
IGLV2-14	0.850662	0.893084	0.843884	0.824282	0.0251	0.0289829
MIR4484	0.912449	0.978812	0.965405	0.960402	0.0250644	0.0289419
UQCRC2P1	0.916494	0.977558	0.95516	0.92266	0.024791	0.0286261
RNU6-114P	0.168208	0.215269	0.233874	0.219916	0.0247021	0.0285235
C7orf72	0.100382	0.0491717	0.109346	0.106302	0.0245357	0.0283314
OR10C1	0.14389	0.0752709	0.116836	0.112384	0.0244411	0.0282222
RN7SL277P	0.954385	0.902002	0.945478	0.966872	0.0244123	0.0281889
RN7SL820P	0.96378	0.89675	0.92886	0.934123	0.0237793	0.027458
NUMB	0.88206	0.921947	0.855775	0.879192	0.0237766	0.0274549
RNU6ATAC29P	0.897341	0.961497	0.943385	0.93725	0.0234288	0.0270533
RNU6ATAC34P	0.913436	0.946068	0.977033	0.960535	0.0234094	0.0270309
RNA5SP168	0.900114	0.949967	0.88792	0.915928	0.0232876	0.0268901
SCGB2B3P	0.888092	0.919599	0.859116	0.867909	0.0232477	0.0268441
RN7SKP144	0.0690952	0.0408015	0.102284	0.0888374	0.0231302	0.0267085
RNA5SP38	0.927629	0.931863	0.927413	0.982131	0.0230885	0.0266603
CBX3P9	0.935921	0.98009	0.926956	0.923927	0.022586	0.02608
MRPL53P1	0.920598	0.945809	0.978501	0.968591	0.0223296	0.025784
RN7SL299P	0.907692	0.96786	0.950931	0.938593	0.0219944	0.0253969
RN7SL605P	0.894412	0.881524	0.920555	0.936951	0.0216844	0.025039
RPS6P8	0.889896	0.950156	0.922477	0.914269	0.0215179	0.0248467
YWHAEP7	0.832625	0.886941	0.839977	0.865265	0.0214834	0.0248069
TMEM209	0.852688	0.907394	0.901548	0.889998	0.0212751	0.0245664
TAS2R4	0.88741	0.834515	0.866932	0.843231	0.0207027	0.0239055
RNU6-72P	0.908461	0.902182	0.952204	0.938075	0.0206458	0.0238398
RNU7-3P	0.885839	0.931914	0.9126	0.938547	0.0204749	0.0236424
SYP-AS1	0.927644	0.952002	0.89756	0.910789	0.0203408	0.0234876
RNU6-680P	0.971023	0.983798	0.963667	0.929416	0.0201314	0.0232457
RN7SL16P	0.925317	0.977982	0.968708	0.962062	0.0199847	0.0230764
TTLL3	0.914084	0.884549	0.927675	0.937427	0.0199263	0.0230089
RNA5SP51	0.885793	0.93858	0.927295	0.92424	0.0198893	0.0229662
RNU5A-5P	0.91691	0.920042	0.955675	0.959853	0.0197305	0.0227828
RNU1-73P	0.920873	0.873616	0.916894	0.919344	0.0197188	0.0227693
RNU6-413P	0.941874	0.946401	0.899779	0.912343	0.019615	0.0226494
RNU6-840P	0.836717	0.835838	0.820659	0.788463	0.019523	0.0225433
DEFB122	0.0639146	0.0155413	0.0517939	0.0609872	0.0192995	0.0222852
RNU2-39P	0.911461	0.947765	0.896542	0.908812	0.0191039	0.0220592
RN7SKP163	0.938226	0.963642	0.987422	0.980746	0.0190012	0.0219407
RN7SL80P	0.918885	0.971	0.938999	0.938887	0.018668	0.021556
CFL1P4	0.957517	0.950873	0.921394	0.914806	0.0183481	0.0211865
MIR1305	0.928807	0.89205	0.92166	0.941271	0.0180995	0.0208995
ZNF800	0.775123	0.820882	0.778359	0.791098	0.0180574	0.0208508
MTND1P9	0.880959	0.931037	0.90335	0.897729	0.0180243	0.0208127
RNU6-768P	0.934404	0.977452	0.963662	0.93776	0.0179531	0.0207304
RNU6-379P	0.933555	0.979422	0.94246	0.940029	0.017939	0.0207142
ZNF583	0.0770573	0.0706614	0.0992291	0.115709	0.0179294	0.020703
RNA5SP86	0.894393	0.907594	0.939004	0.930166	0.0177098	0.0204496
RN7SL718P	0.117213	0.157536	0.159148	0.156104	0.0175193	0.0202296
MIR4666A	0.934862	0.90272	0.945078	0.94479	0.0173208	0.0200003
RN7SL621P	0.927132	0.972801	0.954485	0.938499	0.017195	0.0198551
RNA5SP189	0.928732	0.97722	0.954969	0.954649	0.0171678	0.0198236
RNU6-43P	0.942875	0.981748	0.938879	0.947176	0.0170431	0.0196797
RN7SKP120	0.0593988	0.0264787	0.0728577	0.0512434	0.0168872	0.0194997
MIR3942	0.935607	0.963871	0.92106	0.924146	0.0168861	0.0194984
RMDN2	0.839039	0.79365	0.815638	0.827531	0.0167946	0.0193927
IL9RP4	0.914645	0.961895	0.942376	0.940279	0.0167917	0.0193894
RN7SL683P	0.918842	0.965538	0.940967	0.947692	0.0167139	0.0192995
KRT8P31	0.930319	0.934211	0.966001	0.964312	0.016514	0.0190687
ROPN1	0.934292	0.980154	0.954431	0.950389	0.0164546	0.0190001
RN7SL226P	0.0490474	0.0206763	0.0434982	0.0660397	0.0162235	0.0187333
MUC7	0.0832201	0.0453044	0.0772762	0.0837954	0.0158499	0.0183019
MIR660	0.884891	0.92336	0.888727	0.887624	0.0157712	0.018211
MIR5006	0.921534	0.953547	0.929988	0.910784	0.0157409	0.018176
RNA5SP465	0.946264	0.967198	0.981419	0.986926	0.0157107	0.0181411
MPP7	0.0750473	0.047694	0.0726213	0.0916268	0.0156956	0.0181237
RNU6-957P	0.973886	0.963857	0.942879	0.935186	0.0155744	0.0179838
SOSTDC1	0.0838944	0.0529271	0.0809436	0.095253	0.0155681	0.0179765
CLDN20	0.94451	0.977315	0.979537	0.950806	0.0155639	0.0179716
RNU6-836P	0.931982	0.956428	0.968225	0.971613	0.0155384	0.0179422
RN7SKP287	0.948208	0.935411	0.967558	0.972514	0.0149242	0.017233
RNU6-912P	0.972905	0.961632	0.943734	0.934863	0.0148761	0.0171774
GAPDHP16	0.94507	0.946484	0.976183	0.97427	0.0147489	0.0170306
MIR2681	0.0453743	0.0738194	0.0353838	0.0437248	0.0145005	0.0167437
SLMAP	0.937985	0.965771	0.926081	0.943485	0.0144022	0.0166302
ATG16L1	0.917388	0.900122	0.929282	0.938206	0.0142594	0.0164654
MIR1255A	0.987323	0.972407	0.965841	0.948182	0.0140486	0.0162219
CRIPAK	0.950462	0.979738	0.947547	0.945161	0.0139894	0.0161536
COX7A2	0.933943	0.957372	0.919592	0.929031	0.0139163	0.0160692
HNRNPA1P55	0.0696678	0.0413176	0.0787298	0.0664932	0.0138725	0.0160186
MIR3198-1	0.91605	0.907858	0.940753	0.937124	0.0138593	0.0160034
RPL32P33	0.922815	0.933552	0.955457	0.953758	0.0137597	0.0158883
IGKV1-12	0.054033	0.0227833	0.0384267	0.0567133	0.0135961	0.0156994
ANTXR2	0.915136	0.937816	0.912887	0.90015	0.0135702	0.0156695
RNU6ATAC30P	0.958825	0.968435	0.934588	0.940931	0.0135607	0.0156585
RPL31P60	0.929558	0.922337	0.95528	0.949024	0.0135308	0.015624
RNA5SP87	0.0363744	0.0264936	0.061903	0.0507736	0.0135182	0.0156095
OR8B2	0.943562	0.971462	0.939449	0.940301	0.0132346	0.015282
RNU6-1074P	0.936486	0.96053	0.925819	0.931444	0.0132281	0.0152745
RNA5SP188	0.92979	0.966452	0.944834	0.942684	0.0131662	0.0152031
RNU6-970P	0.949641	0.963116	0.928157	0.937832	0.0130808	0.0151044
HSD17B12	0.403662	0.39844	0.369762	0.385908	0.0130668	0.0150882
MIR670HG	0.403662	0.39844	0.369762	0.385908	0.0130668	0.0150882
RUNX1	0.930968	0.929983	0.962003	0.936208	0.0130409	0.0150584
RNA5SP53	0.953286	0.989374	0.965667	0.972014	0.0130144	0.0150277
DEC1	0.0613401	0.050171	0.0697927	0.035524	0.0128369	0.0148227
TUBB4BP7	0.0601297	0.0470988	0.0818225	0.0687202	0.0126468	0.0146033
ZNF630-AS1	0.950517	0.976112	0.946478	0.945256	0.0125771	0.0145228
RAD1P1	0.933564	0.945036	0.963891	0.961935	0.0125029	0.0144372
RPL21P111	0.923698	0.958045	0.935638	0.935495	0.0124301	0.0143531
CICP13	0.935546	0.928191	0.960248	0.934245	0.0122638	0.014161
RNY3P4	0.923436	0.907105	0.940246	0.93185	0.0122506	0.0141458
FAF2P1	0.966016	0.978829	0.946337	0.955366	0.0121259	0.0140018
BTF3P9	0.942981	0.971243	0.941363	0.947491	0.0120319	0.0138932
HMGB1P48	0.947266	0.97913	0.953598	0.95854	0.0119448	0.0137927
NIFKP6	0.952281	0.964661	0.940049	0.93372	0.0118602	0.013695
NR3C1	0.922057	0.945603	0.92929	0.951345	0.0118584	0.013693
TRAV9-1	0.042872	0.0100125	0.0255258	0.0314709	0.0118509	0.0136842
RNU6-223P	0.941009	0.96913	0.941592	0.943416	0.0117785	0.0136007
RN7SL160P	0.936476	0.951341	0.928582	0.919878	0.0115714	0.0133615
RNU6-807P	0.948137	0.975857	0.948644	0.951753	0.0114918	0.0132696
RNU6-571P	0.955243	0.960594	0.930438	0.946032	0.0114387	0.0132082
RNU6-58P	0.923133	0.952365	0.949188	0.944726	0.0114235	0.0131907
RN7SL682P	0.972948	0.990992	0.959237	0.970181	0.0114085	0.0131734
RN7SL198P	0.953968	0.963754	0.93787	0.937023	0.0112563	0.0129976
KRTAP2-4	0.977725	0.995258	0.970802	0.965643	0.0111891	0.0129201
RNU1-77P	0.951915	0.975083	0.95306	0.945452	0.0111825	0.0129124
RNA5SP182	0.961609	0.990505	0.969688	0.96727	0.0109298	0.0126206
MTCP1	0.927759	0.949575	0.920808	0.926782	0.0109201	0.0126094
MIRLET7F2	0.935344	0.965846	0.950553	0.948021	0.0108409	0.012518
AAED1	0.0425592	0.069546	0.0645961	0.0503597	0.010811	0.0124835
MIR3938	0.923817	0.948067	0.926977	0.920419	0.0107874	0.0124562
CKS1BP7	0.952268	0.930794	0.958169	0.954425	0.0106728	0.0123238
LINC00458	0.883277	0.89232	0.863636	0.874091	0.0106545	0.0123027
XRCC6P4	0.0505672	0.0285782	0.0532643	0.0543114	0.0105401	0.0121707
CHML	0.964528	0.957876	0.98278	0.980555	0.0105292	0.0121581
RNU4ATAC14P	0.975988	0.980088	0.961003	0.954458	0.0105145	0.0121411
LECT2	0.917887	0.941545	0.943061	0.926969	0.0104571	0.0120748
RNU4-35P	0.954464	0.926032	0.947097	0.94241	0.010434	0.0120481
FAM229A	0.941731	0.924847	0.950446	0.949354	0.0102356	0.0118191
RNU6-917P	0.047792	0.0325376	0.0492857	0.0611511	0.0101655	0.0117382
OR10A6	0.0580478	0.0449762	0.0444894	0.0295994	0.0100698	0.0116276
NPM1P24	0.938091	0.958632	0.940454	0.931732	0.00999397	0.01154
ADORA2A	0.95205	0.951483	0.972494	0.97078	0.00995534	0.0114954
RNU6-480P	0.0436953	0.0350735	0.0511497	0.0621564	0.00994922	0.0114884
RNU7-158P	0.950684	0.976502	0.962518	0.954773	0.00984555	0.0113687
RNU7-185P	0.0347414	0.0195186	0.0459218	0.0390667	0.00968795	0.0111867
SNORD103A	0.950235	0.977151	0.967686	0.966264	0.00966972	0.0111656
UBN2	0.948584	0.964159	0.944968	0.937778	0.009645	0.0111371
SDHCP3	0.962267	0.976412	0.956905	0.950415	0.00957819	0.0110599
NAP1L1P1	0.97601	0.95137	0.970087	0.97227	0.00951326	0.010985
TATDN1P1	0.966138	0.946672	0.971951	0.964947	0.0094742	0.0109399
PPP4R1	0.0514958	0.0426722	0.0261673	0.0450462	0.00933892	0.0107837
RNU6-361P	0.967927	0.992069	0.981069	0.97185	0.0093064	0.0107461
RFWD2P1	0.0411834	0.029251	0.0449473	0.0545066	0.00904728	0.0104469
RNU6-655P	0.0489684	0.0319181	0.0286297	0.0472849	0.00902143	0.0104171
TM4SF20	0.939269	0.959175	0.936554	0.940211	0.00897628	0.0103649
RN7SKP247	0.969409	0.987393	0.963907	0.968528	0.00895578	0.0103412
INTS8	0.0374809	0.0182163	0.0283732	0.0410914	0.00885751	0.0102278
OR10J3	0.0443168	0.0388938	0.0484974	0.0626474	0.00880192	0.0101636
MIR4723	0.96477	0.971959	0.951338	0.953281	0.00844837	0.00975534
FRRS1	0.0356178	0.0151709	0.0345624	0.0332704	0.00840385	0.00970393
RNU4-44P	0.959978	0.940032	0.96094	0.955704	0.00839329	0.00969174
RPS17	0.0364179	0.0287958	0.0420979	0.0515386	0.00830022	0.00958426
RNU2-19P	0.0119197	0.00830076	0.0199983	0.0297209	0.00823645	0.00951064
RNU6-248P	0.0298053	0.0196421	0.0425604	0.0332213	0.00819494	0.00946271
RN7SL281P	0.980401	0.992367	0.978601	0.969357	0.00818837	0.00945512
HNRNPH1	0.0223398	0.00902322	0.0297001	0.027253	0.00799019	0.00922628
RNU6-759P	0.929058	0.928899	0.939553	0.947501	0.00779841	0.00900483
RNU1-19P	0.971051	0.989258	0.973145	0.970526	0.00771981	0.00891407
ZSWIM6	0.0436193	0.0300773	0.0458153	0.0507994	0.00767176	0.00885858
ERCC1	0.0162441	0.00904557	0.0262649	0.0277207	0.00762946	0.00880974
RN7SL573P	0.974754	0.980696	0.962225	0.96405	0.00761785	0.00879634
RSL24D1P9	0.0212704	0.0050958	0.0254077	0.0182008	0.00760102	0.0087769
RN7SKP90	0.938563	0.947858	0.927363	0.93341	0.00751545	0.0086781
NA	0.979112	0.961648	0.976733	0.980081	0.00745871	0.00861258
RNU6-219P	0.962121	0.9819	0.973758	0.968293	0.00727189	0.00839686
FAM21B	0.963006	0.982775	0.970236	0.969655	0.00714578	0.00825124
TMSB4XP4	0.0189121	0.00720954	0.0172712	0.0272556	0.00712401	0.00822609
MIR548F2	0.952432	0.955147	0.936949	0.94823	0.00694179	0.00801569
SCARNA6	0.95148	0.953772	0.949217	0.967016	0.00691317	0.00798264
RNU7-165P	0.974273	0.959313	0.977467	0.972096	0.00689469	0.0079613
RNU6-503P	0.0405758	0.0486877	0.0336269	0.0318696	0.00662687	0.00765206
MIR566	0.942525	0.943967	0.952868	0.958519	0.00655645	0.00757074
LINC01058	0.0385943	0.0351654	0.051978	0.0450928	0.00643104	0.00742592
LRRC53	0.0251804	0.0179403	0.0314404	0.0347302	0.00641179	0.0074037
BLMH	0.0210692	0.0230756	0.0118943	0.028666	0.00603885	0.00697306
ECD	0.023747	0.0127333	0.0213882	0.0295142	0.00603461	0.00696816
MRPS36	0.0292693	0.0209223	0.0290773	0.0377363	0.00594555	0.00686533
ZACN	0.0201776	0.0200743	0.0300693	0.0334516	0.005939	0.00685777
FDX1P1	0.972989	0.984616	0.98832	0.984924	0.00579884	0.00669593
ATP6V0CP1	0.974953	0.977756	0.968026	0.963138	0.00574302	0.00663147
RNU6-800P	0.0118389	0.013091	0.0227041	0.024875	0.0057312	0.00661782
UBA52P8	0.956379	0.957081	0.968365	0.967969	0.00572569	0.00661146
RNU6-1194P	0.0238909	0.0184094	0.0308938	0.0316539	0.00542684	0.00626637
RN7SKP297	0.985469	0.988893	0.98083	0.974472	0.00540587	0.00624216
RIMKLBP1	0.963925	0.94992	0.95666	0.95571	0.00497651	0.00574638
RN7SKP77	0.0274679	0.0290519	0.0389785	0.0360373	0.00477245	0.00551075
SEC31A	0.0329373	0.0320378	0.0310017	0.042654	0.00466721	0.00538923
IFI6	0.0163435	0.0214882	0.0250188	0.0285026	0.00449566	0.00519114
TBXAS1	0.0207931	0.0163901	0.0277666	0.0260919	0.00448923	0.00518371
IGKV6D-21	0.00935447	0.0114404	0.0178266	0.0193327	0.00419101	0.00483937
UBC	0.0101042	0.0113132	0.0180387	0.0172985	0.00351583	0.00405974
HMGB1P8	0.98672	0.983681	0.989992	0.991615	0.00305479	0.00352736
EIF4EBP2P2	0.0814027	0.08765	0.0896667	0.0864044	0.00304755	0.003519
ARHGAP11A	0.0164415	0.00979002	0.0164055	0.0135587	0.00272289	0.00314412

## Sheet: top100_hypermethylated
Gene_name	Control1	Control2	27_HC1	27_HC2
RNU6-335P	0.66209	0.790783	0.892433	0.944478
RNU4ATAC9P	0.278879	0.425926	0.539312	0.526119
RNU6-1326P	0.561418	0.755496	0.832082	0.787132
MIR576	0.907677	0.657774	0.833956	0.880789
RN7SL336P	0.617212	0.706	0.858768	0.809557
RNU6-1318P	0.664312	0.908182	0.791546	0.738383
RNU6-866P	0.702519	0.689033	0.832941	0.888129
RNU6-1086P	0.495136	0.624253	0.67714	0.713419
THRA	0.753397	0.887382	0.944296	0.955697
RNU6-519P	0.644577	0.690838	0.791853	0.846485
RNU6-1120P	0.553993	0.529089	0.713909	0.651692
RN7SL692P	0.627481	0.674996	0.790329	0.792719
HMGB3P4	0.761268	0.789082	0.920805	0.912876
EYS	0.774998	0.966439	0.916417	0.892213
OR2A12	0.571825	0.585675	0.724612	0.706754
RNU6-68P	0.544079	0.725353	0.641592	0.591973
RNU1-78P	0.610325	0.761341	0.659523	0.597621
RPL6P12	0.788047	0.880876	0.957045	0.929395
DYTN	0.338806	0.398448	0.449364	0.505014
RNU2-22P	0.643633	0.644386	0.781375	0.741413
MIR556	0.811941	0.975118	0.934704	0.909086
RN7SL26P	0.676927	0.836321	0.767371	0.724123
LINC00376	0.80331	0.946183	0.811273	0.874167
LINC00558	0.869343	0.808153	0.953574	0.934386
RNU6-1042P	0.729837	0.757924	0.869769	0.830432
SERPINH1P1	0.821489	0.930456	0.957653	0.945898
RN7SL56P	0.841518	0.948665	0.972029	0.966711
PPP1R14BP2	0.788223	0.925684	0.826927	0.808774
RNU6-664P	0.788223	0.925684	0.826927	0.808774
RNU6-1059P	0.759306	0.806624	0.869726	0.892456
SUMO2P15	0.833276	0.896391	0.820399	0.753058
SUMO2P8	0.824384	0.839567	0.945219	0.916782
UBE2NL	0.853481	0.919787	0.803333	0.794642
RNA5SP220	0.805698	0.92517	0.816134	0.818499
PTDSS2	0.834817	0.848594	0.928886	0.944814
SUMO1P2	0.744083	0.876861	0.829456	0.822857
RNU7-123P	0.710733	0.694007	0.796334	0.796155
MIR548P	0.829446	0.83173	0.926189	0.921063
MIR613	0.806197	0.918944	0.894647	0.918077
RNU6-1188P	0.921485	0.981733	0.913718	0.855185
MIR1277	0.743763	0.846456	0.854322	0.799519
RNU6-266P	0.765472	0.677032	0.758066	0.7955
IDO1	0.591264	0.628744	0.703036	0.679141
USP26	0.942221	0.857661	0.967074	0.958076
RNU6-786P	0.858754	0.979982	0.911932	0.929431
NPM1P27	0.829382	0.860431	0.753955	0.77598
RNU12-2P	0.861516	0.841727	0.92899	0.938644
SUCNR1	0.927237	0.850165	0.951923	0.947103
SYTL5	0.840914	0.917478	0.804619	0.852581
RNY4P22	0.844666	0.944909	0.877875	0.849096
TRGJP	0.912246	0.836774	0.931187	0.934284
MIR3201	0.862381	0.966219	0.94617	0.925669
HMGN1P33	0.831532	0.933633	0.848676	0.875429
MIR1263	0.860644	0.854278	0.932769	0.936136
MIR1256	0.825146	0.891894	0.840284	0.785201
HSPA8P18	0.959411	0.914337	0.873688	0.869074
MIER3	0.763567	0.798001	0.86224	0.822924
RNU6-435P	0.840529	0.837762	0.921837	0.892371
RNU6-268P	0.77115	0.783243	0.829847	0.856866
RNU6-592P	0.849965	0.802243	0.889805	0.880768
FCF1P5	0.936817	0.926805	0.867122	0.861178
EIF1AX-AS1	0.790509	0.794008	0.860553	0.859972
RNU6-897P	0.968565	0.888521	0.964029	0.964371
SDHCP2	0.839587	0.932126	0.872235	0.883543
RPL23AP51	0.823791	0.786716	0.861109	0.868453
RNU6-13P	0.788281	0.731481	0.813369	0.806094
RNU6-697P	0.910559	0.959599	0.90834	0.870605
RPL31P58	0.879924	0.882888	0.938287	0.949351
MIR3064	0.889999	0.974511	0.955945	0.942332
RPEP4	0.873325	0.908993	0.955095	0.938868
MIR98	0.947243	0.972543	0.957844	0.891464
RPL19P21	0.908633	0.986004	0.916045	0.941661
RNU6ATAC32P	0.897572	0.87348	0.953106	0.927504
C4A	0.886135	0.830184	0.904423	0.901489
LINC00310	0.848935	0.926779	0.870566	0.861588
ARL2BPP10	0.756207	0.82129	0.753413	0.751083
DLEU7-AS1	0.917408	0.95082	0.895803	0.871736
ESR1	0.902256	0.977886	0.950521	0.927173
RN7SKP273	0.902433	0.974828	0.950324	0.963986
TMEM123	0.910037	0.947658	0.892933	0.872683
RN7SL412P	0.900143	0.878342	0.942293	0.941272
RNU4-36P	0.902159	0.975721	0.956448	0.953942
MIR4797	0.881241	0.950695	0.890209	0.917676
CRISP3	0.946843	0.881422	0.938442	0.945282
NACAP1	0.933622	0.862896	0.903371	0.922418
RNU6-1301P	0.50638	0.580694	0.545756	0.534926
RPL21P23	0.877602	0.950114	0.92979	0.920824
RNU2-30P	0.951642	0.954179	0.894399	0.908509
MIR5591	0.890326	0.937791	0.865105	0.901755
RNU6-129P	0.928008	0.986155	0.919681	0.935656
RNU6-539P	0.949471	0.940521	0.892803	0.894833
RPS7P3	0.96177	0.917335	0.986812	0.970846
RNU6-731P	0.856866	0.883173	0.918918	0.916538
IGLV2-14	0.850662	0.893084	0.843884	0.824282
MIR4484	0.912449	0.978812	0.965405	0.960402
UQCRC2P1	0.916494	0.977558	0.95516	0.92266
RN7SL277P	0.954385	0.902002	0.945478	0.966872
RN7SL820P	0.96378	0.89675	0.92886	0.934123
NUMB	0.88206	0.921947	0.855775	0.879192
RNU6ATAC29P	0.897341	0.961497	0.943385	0.93725

## Sheet: hypomethyated
Gene_name	Control1	Control2	27_HC1	27_HC2
RNU6-335P	0.66209	0.790783	0.892433	0.944478	0.107827	0.124508
RNU4ATAC9P	0.278879	0.425926	0.539312	0.526119	0.104177	0.120293
RNU6-1326P	0.561418	0.755496	0.832082	0.787132	0.103307	0.119289
MIR576	0.907677	0.657774	0.833956	0.880789	0.0973329	0.11239
RN7SL336P	0.617212	0.706	0.858768	0.809557	0.0934458	0.107902
RNU6-1318P	0.664312	0.908182	0.791546	0.738383	0.0888854	0.102636
RNU6-866P	0.702519	0.689033	0.832941	0.888129	0.0847929	0.0979104
RBMY1A3P	0.26608	0.359104	0.484279	0.44933
LINC00687	0.334178	0.141464	0.302033	0.349712
RNU6-1086P	0.495136	0.624253	0.67714	0.713419	0.0827299	0.0955282
THRA	0.753397	0.887382	0.944296	0.955697	0.0803725	0.0928062
RNU6-519P	0.644577	0.690838	0.791853	0.846485	0.0798482	0.0922007
RNU6-1120P	0.553993	0.529089	0.713909	0.651692	0.074498	0.0860228
LINC01049	0.288054	0.092287	0.14142	0.142322
RN7SL692P	0.627481	0.674996	0.790329	0.792719	0.0721314	0.0832902
HMGB3P4	0.761268	0.789082	0.920805	0.912876	0.0715669	0.0826383
EYS	0.774998	0.966439	0.916417	0.892213	0.0702611	0.0811305
FAM197Y2	0.444805	0.25	0.328895	0.363174
TSPY10	0.444805	0.25	0.328895	0.363174
TSPY11P	0.297724	0.193904	0.368249	0.356133
OR2A12	0.571825	0.585675	0.724612	0.706754	0.0689315	0.0795952
RNU6-39P	0.166188	0.0295854	0.0856991	0.201027
RNU6-68P	0.544079	0.725353	0.641592	0.591973	0.0670499	0.0774226
CYLC1	0.128358	0.161309	0.239667	0.295028
RNU1-78P	0.610325	0.761341	0.659523	0.597621	0.0644161	0.0743813
RPL6P12	0.788047	0.880876	0.957045	0.929395	0.0642637	0.0742053
MIRLET7A2	0.117774	0.12708	0.25557	0.238028
DYTN	0.338806	0.398448	0.449364	0.505014	0.061467	0.070976
SNORD116-27	0.107504	0.0883775	0.148693	0.245606
RNU2-22P	0.643633	0.644386	0.781375	0.741413	0.0603693	0.0697084
MIR556	0.811941	0.975118	0.934704	0.909086	0.0600959	0.0693927
RN7SL26P	0.676927	0.836321	0.767371	0.724123	0.0586444	0.0677167
LINC00376	0.80331	0.946183	0.811273	0.874167	0.0574673	0.0663575
LINC00558	0.869343	0.808153	0.953574	0.934386	0.0572931	0.0661564
RNY5P4	0.356024	0.49389	0.373284	0.366297
RNU6-1042P	0.729837	0.757924	0.869769	0.830432	0.0557917	0.0644228
SERPINH1P1	0.821489	0.930456	0.957653	0.945898	0.0542038	0.0625891
RN7SL56P	0.841518	0.948665	0.972029	0.966711	0.0530839	0.061296
PPP1R14BP2	0.788223	0.925684	0.826927	0.808774	0.0527768	0.0609414
RNU6-664P	0.788223	0.925684	0.826927	0.808774	0.0527768	0.0609414
RNU6-1059P	0.759306	0.806624	0.869726	0.892456	0.052456	0.060571
OR4K11P	0.0189518	0.0980145	0.120223	0.163309
SUMO2P15	0.833276	0.896391	0.820399	0.753058	0.0508911	0.058764
SUMO2P8	0.824384	0.839567	0.945219	0.916782	0.0508074	0.0586673
LINC01075	0.188612	0.0567687	0.0826644	0.0940698
UBE2NL	0.853481	0.919787	0.803333	0.794642	0.0497944	0.0574976
CTDSPL2	0.235648	0.165228	0.120198	0.234138
RNA5SP220	0.805698	0.92517	0.816134	0.818499	0.0486182	0.0561395
PTDSS2	0.834817	0.848594	0.928886	0.944814	0.0481515	0.0556006
SUMO1P2	0.744083	0.876861	0.829456	0.822857	0.0476518	0.0550236
RNU7-123P	0.710733	0.694007	0.796334	0.796155	0.0473086	0.0546273
MIR548P	0.829446	0.83173	0.926189	0.921063	0.0465616	0.0537647
MIR613	0.806197	0.918944	0.894647	0.918077	0.0462282	0.0533797
KCNJ16	0.0794754	0.00751259	0.0891307	0.135865
RNU6-1188P	0.921485	0.981733	0.913718	0.855185	0.0448277	0.0517626
MIR1277	0.743763	0.846456	0.854322	0.799519	0.0441206	0.050946
RNU6-266P	0.765472	0.677032	0.758066	0.7955	0.043861	0.0506463
IDO1	0.591264	0.628744	0.703036	0.679141	0.0434815	0.0502081
USP26	0.942221	0.857661	0.967074	0.958076	0.0434127	0.0501286
RNU6-786P	0.858754	0.979982	0.911932	0.929431	0.0433098	0.0500098
NPM1P27	0.829382	0.860431	0.753955	0.77598	0.0421743	0.0486987
RNU12-2P	0.861516	0.841727	0.92899	0.938644	0.0418286	0.0482995
OR2A14	0.183048	0.143654	0.242433	0.241678
TXNP3	0.133155	0.134965	0.202618	0.226311
SUCNR1	0.927237	0.850165	0.951923	0.947103	0.040865	0.0471869
RN7SKP159	0.0484006	0.159722	0.0852743	0.080218
SYTL5	0.840914	0.917478	0.804619	0.852581	0.0407468	0.0470504
RNU6-116P	0.13951	0.0704113	0.122601	0.183545
RNY4P22	0.844666	0.944909	0.877875	0.849096	0.0400571	0.046254
RNA5SP347	0.0787142	0.0837194	0.157752	0.163828
TRGJP	0.912246	0.836774	0.931187	0.934284	0.0395065	0.0456182
MIR3201	0.862381	0.966219	0.94617	0.925669	0.0389513	0.044977
HMGN1P33	0.831532	0.933633	0.848676	0.875429	0.038703	0.0446904
MIR1263	0.860644	0.854278	0.932769	0.936136	0.0385796	0.0445479
MIR1256	0.825146	0.891894	0.840284	0.785201	0.038211	0.0441222
HSPA8P18	0.959411	0.914337	0.873688	0.869074	0.0364548	0.0420944
FDPSP2	0.0844985	0.0849145	0.147231	0.164975
MIER3	0.763567	0.798001	0.86224	0.822924	0.0360025	0.0415721
GCNT3	0.132154	0.116586	0.19063	0.198571
RNU6-435P	0.840529	0.837762	0.921837	0.892371	0.035554	0.0410542
RNU6-268P	0.77115	0.783243	0.829847	0.856866	0.0346962	0.0400637
RNU6-592P	0.849965	0.802243	0.889805	0.880768	0.0342131	0.0395059
FCF1P5	0.936817	0.926805	0.867122	0.861178	0.0340799	0.0393521
EIF1AX-AS1	0.790509	0.794008	0.860553	0.859972	0.0340251	0.0392888
RNU6-897P	0.968565	0.888521	0.964029	0.964371	0.0334477	0.0386221
SDHCP2	0.839587	0.932126	0.872235	0.883543	0.0332008	0.038337
MTND4P20	0.156343	0.109306	0.202105	0.161951
RPL23AP51	0.823791	0.786716	0.861109	0.868453	0.032626	0.0376733
LINC00459	0.230739	0.157482	0.23115	0.23584
OR6C4	0.144293	0.126084	0.212199	0.153248
RNU6-13P	0.788281	0.731481	0.813369	0.806094	0.0321119	0.0370797
RNU6-697P	0.910559	0.959599	0.90834	0.870605	0.0316007	0.0364894
RPL31P58	0.879924	0.882888	0.938287	0.949351	0.0314684	0.0363366
MIR3064	0.889999	0.974511	0.955945	0.942332	0.0314199	0.0362806
RPEP4	0.873325	0.908993	0.955095	0.938868	0.0311606	0.0359812
MIR98	0.947243	0.972543	0.957844	0.891464	0.0306796	0.0354257
RPL19P21	0.908633	0.986004	0.916045	0.941661	0.0302579	0.0349388
RNU6ATAC32P	0.897572	0.87348	0.953106	0.927504	0.0300778	0.0347308
C4A	0.886135	0.830184	0.904423	0.901489	0.029901	0.0345267
LINC00310	0.848935	0.926779	0.870566	0.861588	0.029768	0.0343732
ARL2BPP10	0.756207	0.82129	0.753413	0.751083	0.0293806	0.0339258
DLEU7-AS1	0.917408	0.95082	0.895803	0.871736	0.0290788	0.0335774
TMSB4Y	0.108599	0.0864151	0.158366	0.147457
ESR1	0.902256	0.977886	0.950521	0.927173	0.0279911	0.0323213
RN7SKP273	0.902433	0.974828	0.950324	0.963986	0.0276452	0.0319219
TMEM123	0.910037	0.947658	0.892933	0.872683	0.0275334	0.0317928
RN7SL412P	0.900143	0.878342	0.942293	0.941272	0.0273797	0.0316153
RNU4-36P	0.902159	0.975721	0.956448	0.953942	0.0272629	0.0314805
IGKV2D-26	0.100862	0.071963	0.13276	0.139998
MIR4797	0.881241	0.950695	0.890209	0.917676	0.027082	0.0312716
CRISP3	0.946843	0.881422	0.938442	0.945282	0.0270753	0.0312638
NACAP1	0.933622	0.862896	0.903371	0.922418	0.0269105	0.0310735
RNU6-1301P	0.50638	0.580694	0.545756	0.534926	0.0265997	0.0307147
RPL21P23	0.877602	0.950114	0.92979	0.920824	0.0264585	0.0305517
RNU2-30P	0.951642	0.954179	0.894399	0.908509	0.0262228	0.0302795
MIR5591	0.890326	0.937791	0.865105	0.901755	0.0261543	0.0302003
RNU6-129P	0.928008	0.986155	0.919681	0.935656	0.0259	0.0299067
RNU6-539P	0.949471	0.940521	0.892803	0.894833	0.0257939	0.0297842
RPS7P3	0.96177	0.917335	0.986812	0.970846	0.0257744	0.0297617
RNU6-731P	0.856866	0.883173	0.918918	0.916538	0.0256175	0.0295805
MIR4282	0.0541211	0.0592291	0.0966097	0.114079
IGLV2-14	0.850662	0.893084	0.843884	0.824282	0.0251	0.0289829
MIR4484	0.912449	0.978812	0.965405	0.960402	0.0250644	0.0289419
UQCRC2P1	0.916494	0.977558	0.95516	0.92266	0.024791	0.0286261
RNU6-114P	0.168208	0.215269	0.233874	0.219916
C7orf72	0.100382	0.0491717	0.109346	0.106302
OR10C1	0.14389	0.0752709	0.116836	0.112384
RN7SL277P	0.954385	0.902002	0.945478	0.966872	0.0244123	0.0281889
RN7SL820P	0.96378	0.89675	0.92886	0.934123	0.0237793	0.027458
NUMB	0.88206	0.921947	0.855775	0.879192	0.0237766	0.0274549
RNU6ATAC29P	0.897341	0.961497	0.943385	0.93725	0.0234288	0.0270533
RNU6ATAC34P	0.913436	0.946068	0.977033	0.960535	0.0234094	0.0270309
RNA5SP168	0.900114	0.949967	0.88792	0.915928	0.0232876	0.0268901
SCGB2B3P	0.888092	0.919599	0.859116	0.867909	0.0232477	0.0268441
RN7SKP144	0.0690952	0.0408015	0.102284	0.0888374
RNA5SP38	0.927629	0.931863	0.927413	0.982131	0.0230885	0.0266603
CBX3P9	0.935921	0.98009	0.926956	0.923927	0.022586	0.02608
MRPL53P1	0.920598	0.945809	0.978501	0.968591	0.0223296	0.025784
RN7SL299P	0.907692	0.96786	0.950931	0.938593	0.0219944	0.0253969
RN7SL605P	0.894412	0.881524	0.920555	0.936951	0.0216844	0.025039
RPS6P8	0.889896	0.950156	0.922477	0.914269	0.0215179	0.0248467
YWHAEP7	0.832625	0.886941	0.839977	0.865265	0.0214834	0.0248069
TMEM209	0.852688	0.907394	0.901548	0.889998	0.0212751	0.0245664
TAS2R4	0.88741	0.834515	0.866932	0.843231	0.0207027	0.0239055
RNU6-72P	0.908461	0.902182	0.952204	0.938075	0.0206458	0.0238398
RNU7-3P	0.885839	0.931914	0.9126	0.938547	0.0204749	0.0236424
SYP-AS1	0.927644	0.952002	0.89756	0.910789	0.0203408	0.0234876
RNU6-680P	0.971023	0.983798	0.963667	0.929416	0.0201314	0.0232457
RN7SL16P	0.925317	0.977982	0.968708	0.962062	0.0199847	0.0230764
TTLL3	0.914084	0.884549	0.927675	0.937427	0.0199263	0.0230089
RNA5SP51	0.885793	0.93858	0.927295	0.92424	0.0198893	0.0229662
RNU5A-5P	0.91691	0.920042	0.955675	0.959853	0.0197305	0.0227828
RNU1-73P	0.920873	0.873616	0.916894	0.919344	0.0197188	0.0227693
RNU6-413P	0.941874	0.946401	0.899779	0.912343	0.019615	0.0226494
RNU6-840P	0.836717	0.835838	0.820659	0.788463	0.019523	0.0225433
DEFB122	0.0639146	0.0155413	0.0517939	0.0609872
RNU2-39P	0.911461	0.947765	0.896542	0.908812	0.0191039	0.0220592
RN7SKP163	0.938226	0.963642	0.987422	0.980746	0.0190012	0.0219407
RN7SL80P	0.918885	0.971	0.938999	0.938887	0.018668	0.021556
CFL1P4	0.957517	0.950873	0.921394	0.914806	0.0183481	0.0211865
MIR1305	0.928807	0.89205	0.92166	0.941271	0.0180995	0.0208995
ZNF800	0.775123	0.820882	0.778359	0.791098	0.0180574	0.0208508
MTND1P9	0.880959	0.931037	0.90335	0.897729	0.0180243	0.0208127
RNU6-768P	0.934404	0.977452	0.963662	0.93776	0.0179531	0.0207304
RNU6-379P	0.933555	0.979422	0.94246	0.940029	0.017939	0.0207142
ZNF583	0.0770573	0.0706614	0.0992291	0.115709
RNA5SP86	0.894393	0.907594	0.939004	0.930166	0.0177098	0.0204496
RN7SL718P	0.117213	0.157536	0.159148	0.156104
MIR4666A	0.934862	0.90272	0.945078	0.94479	0.0173208	0.0200003
RN7SL621P	0.927132	0.972801	0.954485	0.938499	0.017195	0.0198551
RNA5SP189	0.928732	0.97722	0.954969	0.954649	0.0171678	0.0198236
RNU6-43P	0.942875	0.981748	0.938879	0.947176	0.0170431	0.0196797
RN7SKP120	0.0593988	0.0264787	0.0728577	0.0512434
MIR3942	0.935607	0.963871	0.92106	0.924146	0.0168861	0.0194984
RMDN2	0.839039	0.79365	0.815638	0.827531	0.0167946	0.0193927
IL9RP4	0.914645	0.961895	0.942376	0.940279	0.0167917	0.0193894
RN7SL683P	0.918842	0.965538	0.940967	0.947692	0.0167139	0.0192995
KRT8P31	0.930319	0.934211	0.966001	0.964312	0.016514	0.0190687
ROPN1	0.934292	0.980154	0.954431	0.950389	0.0164546	0.0190001
RN7SL226P	0.0490474	0.0206763	0.0434982	0.0660397
MUC7	0.0832201	0.0453044	0.0772762	0.0837954
MIR660	0.884891	0.92336	0.888727	0.887624	0.0157712	0.018211
MIR5006	0.921534	0.953547	0.929988	0.910784	0.0157409	0.018176
RNA5SP465	0.946264	0.967198	0.981419	0.986926	0.0157107	0.0181411
MPP7	0.0750473	0.047694	0.0726213	0.0916268
RNU6-957P	0.973886	0.963857	0.942879	0.935186	0.0155744	0.0179838
SOSTDC1	0.0838944	0.0529271	0.0809436	0.095253
CLDN20	0.94451	0.977315	0.979537	0.950806	0.0155639	0.0179716
RNU6-836P	0.931982	0.956428	0.968225	0.971613	0.0155384	0.0179422
RN7SKP287	0.948208	0.935411	0.967558	0.972514	0.0149242	0.017233
RNU6-912P	0.972905	0.961632	0.943734	0.934863	0.0148761	0.0171774
GAPDHP16	0.94507	0.946484	0.976183	0.97427	0.0147489	0.0170306
MIR2681	0.0453743	0.0738194	0.0353838	0.0437248
SLMAP	0.937985	0.965771	0.926081	0.943485	0.0144022	0.0166302
ATG16L1	0.917388	0.900122	0.929282	0.938206	0.0142594	0.0164654
MIR1255A	0.987323	0.972407	0.965841	0.948182	0.0140486	0.0162219
CRIPAK	0.950462	0.979738	0.947547	0.945161	0.0139894	0.0161536
COX7A2	0.933943	0.957372	0.919592	0.929031	0.0139163	0.0160692
HNRNPA1P55	0.0696678	0.0413176	0.0787298	0.0664932
MIR3198-1	0.91605	0.907858	0.940753	0.937124	0.0138593	0.0160034
RPL32P33	0.922815	0.933552	0.955457	0.953758	0.0137597	0.0158883
IGKV1-12	0.054033	0.0227833	0.0384267	0.0567133
ANTXR2	0.915136	0.937816	0.912887	0.90015	0.0135702	0.0156695
RNU6ATAC30P	0.958825	0.968435	0.934588	0.940931	0.0135607	0.0156585
RPL31P60	0.929558	0.922337	0.95528	0.949024	0.0135308	0.015624
RNA5SP87	0.0363744	0.0264936	0.061903	0.0507736
OR8B2	0.943562	0.971462	0.939449	0.940301	0.0132346	0.015282
RNU6-1074P	0.936486	0.96053	0.925819	0.931444	0.0132281	0.0152745
RNA5SP188	0.92979	0.966452	0.944834	0.942684	0.0131662	0.0152031
RNU6-970P	0.949641	0.963116	0.928157	0.937832	0.0130808	0.0151044
HSD17B12	0.403662	0.39844	0.369762	0.385908
MIR670HG	0.403662	0.39844	0.369762	0.385908
RUNX1	0.930968	0.929983	0.962003	0.936208	0.0130409	0.0150584
RNA5SP53	0.953286	0.989374	0.965667	0.972014	0.0130144	0.0150277
DEC1	0.0613401	0.050171	0.0697927	0.035524
TUBB4BP7	0.0601297	0.0470988	0.0818225	0.0687202
ZNF630-AS1	0.950517	0.976112	0.946478	0.945256	0.0125771	0.0145228
RAD1P1	0.933564	0.945036	0.963891	0.961935	0.0125029	0.0144372
RPL21P111	0.923698	0.958045	0.935638	0.935495	0.0124301	0.0143531
CICP13	0.935546	0.928191	0.960248	0.934245	0.0122638	0.014161
RNY3P4	0.923436	0.907105	0.940246	0.93185	0.0122506	0.0141458
FAF2P1	0.966016	0.978829	0.946337	0.955366	0.0121259	0.0140018
BTF3P9	0.942981	0.971243	0.941363	0.947491	0.0120319	0.0138932
HMGB1P48	0.947266	0.97913	0.953598	0.95854	0.0119448	0.0137927
NIFKP6	0.952281	0.964661	0.940049	0.93372	0.0118602	0.013695
NR3C1	0.922057	0.945603	0.92929	0.951345	0.0118584	0.013693
TRAV9-1	0.042872	0.0100125	0.0255258	0.0314709
RNU6-223P	0.941009	0.96913	0.941592	0.943416	0.0117785	0.0136007
RN7SL160P	0.936476	0.951341	0.928582	0.919878	0.0115714	0.0133615
RNU6-807P	0.948137	0.975857	0.948644	0.951753	0.0114918	0.0132696
RNU6-571P	0.955243	0.960594	0.930438	0.946032	0.0114387	0.0132082
RNU6-58P	0.923133	0.952365	0.949188	0.944726	0.0114235	0.0131907
RN7SL682P	0.972948	0.990992	0.959237	0.970181	0.0114085	0.0131734
RN7SL198P	0.953968	0.963754	0.93787	0.937023	0.0112563	0.0129976
KRTAP2-4	0.977725	0.995258	0.970802	0.965643	0.0111891	0.0129201
RNU1-77P	0.951915	0.975083	0.95306	0.945452	0.0111825	0.0129124
RNA5SP182	0.961609	0.990505	0.969688	0.96727	0.0109298	0.0126206
MTCP1	0.927759	0.949575	0.920808	0.926782	0.0109201	0.0126094
MIRLET7F2	0.935344	0.965846	0.950553	0.948021	0.0108409	0.012518
AAED1	0.0425592	0.069546	0.0645961	0.0503597
MIR3938	0.923817	0.948067	0.926977	0.920419	0.0107874	0.0124562
CKS1BP7	0.952268	0.930794	0.958169	0.954425	0.0106728	0.0123238
LINC00458	0.883277	0.89232	0.863636	0.874091	0.0106545	0.0123027
XRCC6P4	0.0505672	0.0285782	0.0532643	0.0543114
CHML	0.964528	0.957876	0.98278	0.980555	0.0105292	0.0121581
RNU4ATAC14P	0.975988	0.980088	0.961003	0.954458	0.0105145	0.0121411
LECT2	0.917887	0.941545	0.943061	0.926969	0.0104571	0.0120748
RNU4-35P	0.954464	0.926032	0.947097	0.94241	0.010434	0.0120481
FAM229A	0.941731	0.924847	0.950446	0.949354	0.0102356	0.0118191
RNU6-917P	0.047792	0.0325376	0.0492857	0.0611511
OR10A6	0.0580478	0.0449762	0.0444894	0.0295994
NPM1P24	0.938091	0.958632	0.940454	0.931732	0.00999397	0.01154
ADORA2A	0.95205	0.951483	0.972494	0.97078	0.00995534	0.0114954
RNU6-480P	0.0436953	0.0350735	0.0511497	0.0621564
RNU7-158P	0.950684	0.976502	0.962518	0.954773	0.00984555	0.0113687
RNU7-185P	0.0347414	0.0195186	0.0459218	0.0390667
SNORD103A	0.950235	0.977151	0.967686	0.966264	0.00966972	0.0111656
UBN2	0.948584	0.964159	0.944968	0.937778	0.009645	0.0111371
SDHCP3	0.962267	0.976412	0.956905	0.950415	0.00957819	0.0110599
NAP1L1P1	0.97601	0.95137	0.970087	0.97227	0.00951326	0.010985
TATDN1P1	0.966138	0.946672	0.971951	0.964947	0.0094742	0.0109399
PPP4R1	0.0514958	0.0426722	0.0261673	0.0450462
RNU6-361P	0.967927	0.992069	0.981069	0.97185	0.0093064	0.0107461
RFWD2P1	0.0411834	0.029251	0.0449473	0.0545066
RNU6-655P	0.0489684	0.0319181	0.0286297	0.0472849
TM4SF20	0.939269	0.959175	0.936554	0.940211	0.00897628	0.0103649
RN7SKP247	0.969409	0.987393	0.963907	0.968528	0.00895578	0.0103412
INTS8	0.0374809	0.0182163	0.0283732	0.0410914
OR10J3	0.0443168	0.0388938	0.0484974	0.0626474
MIR4723	0.96477	0.971959	0.951338	0.953281	0.00844837	0.00975534
FRRS1	0.0356178	0.0151709	0.0345624	0.0332704
RNU4-44P	0.959978	0.940032	0.96094	0.955704	0.00839329	0.00969174
RPS17	0.0364179	0.0287958	0.0420979	0.0515386
RNU2-19P	0.0119197	0.00830076	0.0199983	0.0297209
RNU6-248P	0.0298053	0.0196421	0.0425604	0.0332213
RN7SL281P	0.980401	0.992367	0.978601	0.969357	0.00818837	0.00945512
HNRNPH1	0.0223398	0.00902322	0.0297001	0.027253
RNU6-759P	0.929058	0.928899	0.939553	0.947501	0.00779841	0.00900483
RNU1-19P	0.971051	0.989258	0.973145	0.970526	0.00771981	0.00891407
ZSWIM6	0.0436193	0.0300773	0.0458153	0.0507994
ERCC1	0.0162441	0.00904557	0.0262649	0.0277207
RN7SL573P	0.974754	0.980696	0.962225	0.96405	0.00761785	0.00879634
RSL24D1P9	0.0212704	0.0050958	0.0254077	0.0182008
RN7SKP90	0.938563	0.947858	0.927363	0.93341	0.00751545	0.0086781
NA	0.979112	0.961648	0.976733	0.980081	0.00745871	0.00861258
RNU6-219P	0.962121	0.9819	0.973758	0.968293	0.00727189	0.00839686
FAM21B	0.963006	0.982775	0.970236	0.969655	0.00714578	0.00825124
TMSB4XP4	0.0189121	0.00720954	0.0172712	0.0272556
MIR548F2	0.952432	0.955147	0.936949	0.94823	0.00694179	0.00801569
SCARNA6	0.95148	0.953772	0.949217	0.967016	0.00691317	0.00798264
RNU7-165P	0.974273	0.959313	0.977467	0.972096	0.00689469	0.0079613
RNU6-503P	0.0405758	0.0486877	0.0336269	0.0318696
MIR566	0.942525	0.943967	0.952868	0.958519	0.00655645	0.00757074
LINC01058	0.0385943	0.0351654	0.051978	0.0450928
LRRC53	0.0251804	0.0179403	0.0314404	0.0347302
BLMH	0.0210692	0.0230756	0.0118943	0.028666
ECD	0.023747	0.0127333	0.0213882	0.0295142
MRPS36	0.0292693	0.0209223	0.0290773	0.0377363
ZACN	0.0201776	0.0200743	0.0300693	0.0334516
FDX1P1	0.972989	0.984616	0.98832	0.984924	0.00579884	0.00669593
ATP6V0CP1	0.974953	0.977756	0.968026	0.963138	0.00574302	0.00663147
RNU6-800P	0.0118389	0.013091	0.0227041	0.024875
UBA52P8	0.956379	0.957081	0.968365	0.967969	0.00572569	0.00661146
RNU6-1194P	0.0238909	0.0184094	0.0308938	0.0316539
RN7SKP297	0.985469	0.988893	0.98083	0.974472	0.00540587	0.00624216
RIMKLBP1	0.963925	0.94992	0.95666	0.95571	0.00497651	0.00574638
RN7SKP77	0.0274679	0.0290519	0.0389785	0.0360373
SEC31A	0.0329373	0.0320378	0.0310017	0.042654
IFI6	0.0163435	0.0214882	0.0250188	0.0285026
TBXAS1	0.0207931	0.0163901	0.0277666	0.0260919
IGKV6D-21	0.00935447	0.0114404	0.0178266	0.0193327
UBC	0.0101042	0.0113132	0.0180387	0.0172985
HMGB1P8	0.98672	0.983681	0.989992	0.991615	0.00305479	0.00352736
EIF4EBP2P2	0.0814027	0.08765	0.0896667	0.0864044
ARHGAP11A	0.0164415	0.00979002	0.0164055	0.0135587
